# Supplementary material for: Design and Modeling of a Novel Transformable Land/Air Robot
Source: Hindawi journal article supplement (doi:10.1155/2019/2064131), 2019-02-04
Supplement: f1 [file 2064131.f1.zip]

Archive with 4 entries (4 files):
- Current data on the brick floor.txt
- Current data on the coment floor.txt
- Current data on the tile floor.txt
- Design and modeling of a novel transformtion land air robot.mp4
